# Supplementary material for: Prescribing Intensity in Resistance Training Using Rating of Perceived Effort: A Randomized Controlled Trial
Source: Front Physiol. 2022 Apr 29;13:891385. doi: 10.3389/fphys.2022.891385 (PMC9099373; doi:10.3389/fphys.2022.891385)
Supplement: Supplementary file 2 [file DataSheet1.XLSX]

## Sheet: 1.  index
sheet
2	adherence data for all participants; n=57 (note that data marked in yellow belongs to participants that adhered to less then 20% of the intervention n=10).
3	adherence data without excluded; n=47 (note excluded are participants that adhered to less then 20% of the intervention n=10).
4	body composition and performance measures data (note that data marked yellow is excluded from performence analysis because participants did not attend post test (n=11).
	body composition.
	strength measurements (note that each value represents the average of the two highest scores. For example "hip_pre_kg" represnts the highest two IMTP values of the three or four attmepts completed per person).
5	questionnaires data (note that data marked in yellow was excluded from this analysis because of missing data due to low adherence).
	questionnaires variables are presented as average (e.g., Q2_av) raw data for each time point (e.g., Q2_t1) and cluster components for each time point (e.g., F1_t1).
6	questionnaires index.

## Sheet: 2. adherence n=57
sub_num	group1fixed	adherence	gender0men	age	s_1	s_2	s_3	s_4	s_5	s_6	s_7	s_8	s_9	s_10	s_11	s_12	s_13	s_14	s_15	s_16
101	1	0.75	0	44	1	1	1	1	1	1	1	1	0	0	1	0	1	1	0	1
102	1	0.875	1	37.5	1	1	1	1	0	1	1	0	1	1	1	1	1	1	1	1
103	1	0.5625	0	42	1	1	1	1	1	1	1	0	0	0	0	0	0	1	0	1
104	1	0.8125	1	28	1	1	1	1	1	1	1	0	1	0	1	0	1	1	1	1
105	1	0.625	0	45	1	1	1	0	1	1	1	0	1	1	1	0	0	0	0	1
106	1	0.625	0	22	1	1	1	0	0	1	0	1	1	0	1	1	1	0	1	0
107	1	0.5	0	38	1	1	0	1	0	1	1	1	1	0	0	0	0	0	0	1
108	1	0.5	1	37	1	1	1	0	1	0	1	1	1	0	1	0	0	0	0	0
109	1	0.5625	1	31	1	1	1	1	0	1	1	1	0	1	0	0	0	1	0	0
110	1	0.75	1	30	1	1	0	1	1	1	1	1	1	0	1	0	1	1	1	0
111	1	0.5625	1	37	1	1	0	1	1	1	0	1	1	1	0	1	0	0	0	0
112	1	0.5	0	34	1	0	0	0	1	1	0	0	1	0	0	1	1	0	1	1
113	1	0.5	0	32	0	1	1	1	0	1	1	1	0	0	0	0	1	1	0	0
114	1	0.75	1	28	0	1	1	1	1	0	1	1	1	1	0	1	1	1	0	1
115	1	0.6875	1	44	1	1	1	1	1	1	1	1	0	1	1	0	1	0	0	0
117	1	0.5625	1	39	1	1	0	1	1	0	1	0	1	0	0	1	1	1	0	0
118	1	0.875	0	40	1	1	1	1	1	0	1	1	1	1	1	1	1	0	1	1
119	1	0.75	1	33	1	1	1	1	1	1	1	0	1	1	0	1	1	0	0	1
120	1	0.4375	1	40	1	1	1	0	1	0	0	1	1	0	0	0	1	0	0	0
121	1	0.1875	1	38	1	1	0	1	0	0	0	0	0	0	0	0	0	0	0	0
122	1	0.5625	1	36	1	1	1	0	1	1	1	0	0	0	1	0	1	1	0	0
123	1	0.875	1	22	1	1	1	1	1	1	1	1	1	0	1	1	1	1	0	1
124	1	0.5	1	42	1	0	1	1	1	1	0	0	1	0	0	0	0	1	1	0
125	1	0.1875	0	19	1	0	0	1	0	0	0	0	1	0	0	0	0	0	0	0
126	1	0.875	1	43	1	1	1	1	1	1	0	1	1	0	1	1	1	1	1	1
127	1	0.8125	0	40	1	0	1	1	1	1	1	1	1	0	1	1	1	1	1	0
128	1	0.75	1	38	1	1	1	0	1	0	1	1	1	1	0	0	1	1	1	1
129	1	0	1	30	0	0	0	0	0	0	0	0	0	0	0	0	0	0	0	0
201	2	0.5	0	25	1	0	1	0	1	1	1	1	0	0	1	1	0	0	0	0
202	2	0.5625	1	22	1	1	0	1	1	1	1	1	1	1	0	0	0	0	0	0
203	2	0.75	0	32	0	1	1	1	1	0	1	1	1	1	0	1	1	0	1	1
204	2	0.6875	1	39	1	0	1	0	1	1	1	1	1	0	1	0	1	1	1	0
205	2	0.1875	1	43	1	1	0	0	1	0	0	0	0	0	0	0	0	0	0	0
206	2	0.125	0	42	1	1	0	0	0	0	0	0	0	0	0	0	0	0	0	0
207	2	0.125	0	28	1	0	1	0	0	0	0	0	0	0	0	0	0	0	0	0
208	2	0.8125	1	37	1	1	1	1	1	0	1	1	1	1	0	1	1	1	0	1
209	2	0.125	1	44	1	0	0	1	0	0	0	0	0	0	0	0	0	0	0	0
211	2	0.75	1	22	1	1	1	1	1	1	1	0	1	1	1	1	1	0	0	0
212	2	1	0	36	1	1	1	1	1	1	1	1	1	1	1	1	1	1	1	1
213	2	0.75	1	28	1	1	1	1	1	1	1	1	0	0	1	1	0	1	1	0
214	2	0.375	1	18	1	1	1	1	1	0	0	0	0	0	1	0	0	0	0	0
215	2	0.625	0	38	1	1	1	0	1	0	1	0	0	1	1	0	1	0	1	1
216	2	0.625	0	44	1	0	1	1	1	1	0	1	1	1	1	0	1	0	0	0
217	2	0.1875	1	35	1	1	0	1	0	0	0	0	0	0	0	0	0	0	0	0
218	2	0.9375	1	37	1	1	1	1	1	1	1	1	1	1	1	1	1	1	0	1
219	2	0.75	0	25	1	1	1	1	1	0	1	0	1	1	1	0	1	0	1	1
220	2	0.3125	1	44	0	1	0	1	1	1	0	0	0	0	0	1	0	0	0	0
221	2	0.875	1	45	1	1	1	1	1	1	1	1	0	1	1	1	1	0	1	1
222	2	0.75	1	30	1	1	0	1	1	1	1	0	1	1	1	1	0	1	0	1
223	2	0.0625	1	44	0	1	0	0	0	0	0	0	0	0	0	0	0	0	0	0
224	2	0.875	0	43	1	1	1	1	1	1	1	1	1	0	1	1	1	1	0	1
225	2	0.9375	1	35	1	1	1	1	1	1	1	1	1	1	1	0	1	1	1	1
226	2	0.4375	0	34	1	1	1	0	0	1	1	0	0	1	0	0	1	0	0	0
227	2	0.6875	1	30	1	1	1	1	1	0	1	1	1	1	0	0	1	0	0	1
228	2	0	0	36	0	0	0	0	0	0	0	0	0	0	0	0	0	0	0	0
229	2	0.625	0	40	1	0	1	1	0	1	1	1	1	1	1	0	0	1	0	0
230	2	0.9375	1	43	1	1	1	1	1	1	1	1	1	1	1	1	1	1	1	0

## Sheet: 3. adherence n=47
sub_num	group1fixed	adherence	gender0men	age	s_1	s_2	s_3	s_4	s_5	s_6	s_7	s_8	s_9	s_10	s_11	s_12	s_13	s_14	s_15	s_16
101	1	0.75	0	44	1	1	1	1	1	1	1	1	0	0	1	0	1	1	0	1
102	1	0.875	1	37.5	1	1	1	1	0	1	1	0	1	1	1	1	1	1	1	1
103	1	0.5625	0	42	1	1	1	1	1	1	1	0	0	0	0	0	0	1	0	1
104	1	0.8125	1	28	1	1	1	1	1	1	1	0	1	0	1	0	1	1	1	1
105	1	0.625	0	45	1	1	1	0	1	1	1	0	1	1	1	0	0	0	0	1
106	1	0.625	0	22	1	1	1	0	0	1	0	1	1	0	1	1	1	0	1	0
107	1	0.5	0	38	1	1	0	1	0	1	1	1	1	0	0	0	0	0	0	1
108	1	0.5	1	37	1	1	1	0	1	0	1	1	1	0	1	0	0	0	0	0
109	1	0.5625	1	31	1	1	1	1	0	1	1	1	0	1	0	0	0	1	0	0
110	1	0.75	1	30	1	1	0	1	1	1	1	1	1	0	1	0	1	1	1	0
111	1	0.5625	1	37	1	1	0	1	1	1	0	1	1	1	0	1	0	0	0	0
112	1	0.5	0	34	1	0	0	0	1	1	0	0	1	0	0	1	1	0	1	1
113	1	0.5	0	32	0	1	1	1	0	1	1	1	0	0	0	0	1	1	0	0
114	1	0.75	1	28	0	1	1	1	1	0	1	1	1	1	0	1	1	1	0	1
115	1	0.6875	1	44	1	1	1	1	1	1	1	1	0	1	1	0	1	0	0	0
117	1	0.5625	1	39	1	1	0	1	1	0	1	0	1	0	0	1	1	1	0	0
118	1	0.875	0	40	1	1	1	1	1	0	1	1	1	1	1	1	1	0	1	1
119	1	0.75	1	33	1	1	1	1	1	1	1	0	1	1	0	1	1	0	0	1
120	1	0.4375	1	40	1	1	1	0	1	0	0	1	1	0	0	0	1	0	0	0
122	1	0.5625	1	36	1	1	1	0	1	1	1	0	0	0	1	0	1	1	0	0
123	1	0.875	1	22	1	1	1	1	1	1	1	1	1	0	1	1	1	1	0	1
124	1	0.5	1	42	1	0	1	1	1	1	0	0	1	0	0	0	0	1	1	0
126	1	0.875	1	43	1	1	1	1	1	1	0	1	1	0	1	1	1	1	1	1
127	1	0.8125	0	40	1	0	1	1	1	1	1	1	1	0	1	1	1	1	1	0
128	1	0.75	1	38	1	1	1	0	1	0	1	1	1	1	0	0	1	1	1	1
201	2	0.5	0	25	1	0	1	0	1	1	1	1	0	0	1	1	0	0	0	0
202	2	0.5625	1	22	1	1	0	1	1	1	1	1	1	1	0	0	0	0	0	0
203	2	0.75	0	32	0	1	1	1	1	0	1	1	1	1	0	1	1	0	1	1
204	2	0.6875	1	39	1	0	1	0	1	1	1	1	1	0	1	0	1	1	1	0
208	2	0.8125	1	37	1	1	1	1	1	0	1	1	1	1	0	1	1	1	0	1
211	2	0.75	1	22	1	1	1	1	1	1	1	0	1	1	1	1	1	0	0	0
212	2	1	0	36	1	1	1	1	1	1	1	1	1	1	1	1	1	1	1	1
213	2	0.75	1	28	1	1	1	1	1	1	1	1	0	0	1	1	0	1	1	0
214	2	0.375	1	18	1	1	1	1	1	0	0	0	0	0	1	0	0	0	0	0
215	2	0.625	0	38	1	1	1	0	1	0	1	0	0	1	1	0	1	0	1	1
216	2	0.625	0	44	1	0	1	1	1	1	0	1	1	1	1	0	1	0	0	0
218	2	0.9375	1	37	1	1	1	1	1	1	1	1	1	1	1	1	1	1	0	1
219	2	0.75	0	25	1	1	1	1	1	0	1	0	1	1	1	0	1	0	1	1
220	2	0.3125	1	44	0	1	0	1	1	1	0	0	0	0	0	1	0	0	0	0
221	2	0.875	1	45	1	1	1	1	1	1	1	1	0	1	1	1	1	0	1	1
222	2	0.75	1	30	1	1	0	1	1	1	1	0	1	1	1	1	0	1	0	1
224	2	0.875	0	43	1	1	1	1	1	1	1	1	1	0	1	1	1	1	0	1
225	2	0.9375	1	35	1	1	1	1	1	1	1	1	1	1	1	0	1	1	1	1
226	2	0.4375	0	34	1	1	1	0	0	1	1	0	0	1	0	0	1	0	0	0
227	2	0.6875	1	30	1	1	1	1	1	0	1	1	1	1	0	0	1	0	0	1
229	2	0.625	0	40	1	0	1	1	0	1	1	1	1	1	1	0	0	1	0	0
230	2	0.9375	1	43	1	1	1	1	1	1	1	1	1	1	1	1	1	1	1	0

## Sheet: 4. composition and performance 
sub_num	group1fixed	adherence	gender0men	age	weight_pre_kg	weight_post_kg	BMI_pre	BMI_post	FFM_pre_kg	FFM_post_kg	hip_pre_kg	hip_post_kg	height_jump_pre_cm	height_jump_post_cm	grip_pre_kg	grip_post_kg	knee_pre_kg	knee_post_kg	pushup_pre_reps	pushup_post_reps
101	1	0.75	0	44	69.8	69.65	23.5	23.3	54.21	54.33	221.9	283	31.5	31	46.55	50.75	35.35	44.05	33	41
102	1	0.875	1	37.5	78.4	77.2	26.4	26.03	47.66	48.26	164.7	141.85	22	21	28.15	25.15	26.4	23.6	8	12
103	1	0.5625	0	42	66.6	60	25.9	23.3	51.9	51.08	205.7	219.1	28	28	27.35	28.45	54.5	50.2	35	46
104	1	0.8125	1	28	48	46.45	19.06	18.5	34.49	34.96	126.75	125.75	19	20	19.3	17.7	24.95	28.8	17	24
105	1	0.625	0	45	93.65	94.95	34.82	34.96	52.46	53.36	210.35	218.7	17	17.5	31.2	27.85	54.5	50.7	22	38
106	1	0.625	0	22	51.45	#NULL!	18.3	#NULL!	17.6	#NULL!	186.3	#NULL!	31	#NULL!	18.75	#NULL!	45.65	#NULL!	30	#NULL!
107	1	0.5	0	38	89.9	88.6	29.8	29.4	62.62	61.87	252.3	263.8	26.5	25.5	34.4	39.45	51.7	54.2	20	25
108	1	0.5	1	37	49.25	50.4	17.6	18	39.55	40.2	140.3	144.35	19.5	17.5	29	24.25	36.55	38.55	29	45
109	1	0.5625	1	31	63.45	62.05	25.4	24.89	41.49	41.83	173.9	175.35	20.5	18.5	21.4	23.85	35	38.6	15	15
110	1	0.75	1	30	65.1	64.95	21.3	21.23	45.95	46.56	170.8	175.05	21.5	21.5	28.7	28.25	30.15	33.5	9	15
111	1	0.5625	1	37	63.5	62.6	25.6	25.4	41.92	41.67	169	160.05	15.5	14	21.1	20.9	35.45	36.75	31	30
112	1	0.5	0	34	84.75	84.05	27.8	27.44	62.37	61	254.3	252.8	24.5	24	36.6	33.1	47.2	45.35	15	30
113	1	0.5	0	32	71.7	71.5	22.08	21.82	18	17.9	159.85	169.2	28.5	28.5	39.95	38.55	35.65	30.4	42	44
114	1	0.75	1	28	59.3	60.5	22.91	23.37	38.92	39.61	153.55	154.8	19.5	20	24.6	26.75	27.3	29.7	15	31
115	1	0.6875	1	44	114.75	116.2	42.8	43.4	58.42	59.39	220.1	257.25	11.5	13.5	23.7	23.4	29.9	45.45	13	28
117	1	0.5625	1	39	61.05	60.5	21.27	21.03	42.77	43.07	143.5	151.35	23	22.5	21.45	18.65	28.35	28.7	9	31
118	1	0.875	0	40	102.25	103.9	32.64	32.9	63	64.84	226.75	219.25	21.5	21.5	32.65	31.2	46.8	44.15	20	23
119	1	0.75	1	33	47.9	48.15	18.4	18.5	33.84	34.19	145.55	149.25	19	20	18.35	16.65	23.3	25.8	17	17
120	1	0.4375	1	40	63.6	63.4	23.3	23.26	40.57	41.35	151.4	145	22.5	23.5	21.15	20.45	28.9	27.7	9	10
121	1	0.1875	1	38	68.2	#NULL!	27.63	#NULL!	44.671	#NULL!	183.05	#NULL!	24.5	#NULL!	26.55	#NULL!	33.7	#NULL!	21	#NULL!
122	1	0.5625	1	36	72.1	71.3	23.3	23.04	46.24	46.94	143.05	172.55	15.5	18	19.2	23.85	34.7	38.6	8	13
123	1	0.875	1	22	80.45	79.75	28.9	28.6	54.6	54.88	195.7	185.9	19.5	21.5	23.9	27.75	43.65	48.75	12	13
124	1	0.5	1	42	88.3	85.45	28.4	27.5	53.7	52.51	189.9	182.1	13.5	12.5	24.45	23.45	31.5	31.15	10	14
125	1	0.1875	0	19	57.95	#NULL!	18.25	#NULL!	53.7776	#NULL!	181.9	#NULL!	39	#NULL!	23.75	#NULL!	38.2	#NULL!	16
126	1	0.875	1	43	59.9	59.7	22.6	22.5	39.99	41.16	153.6	149.65	16.5	18.5	23.6	23.05	17.6	23.9	15	17
127	1	0.8125	0	40	82.56	83.3	27.6	27.83	58.44	59.3	271.5	286.65	27	31	39.95	36.4	57.75	60.45	14	20
128	1	0.75	1	38	86.05	87.5	27.4	27.9	48.05	48.85	163.25	174.35	10.5	13.5	19.05	19.1	17.1	30.15	7	7
129	1	0	1	30	58.4	#NULL!	21.4	#NULL!	39.8288	#NULL!	145.85	#NULL!	21	#NULL!	33.45	#NULL!	29.95	#NULL!	16	#NULL!
201	2	0.5	0	25	88.45	86.6	27.95	27.4	67.83	67.3	296.65	317.4	38.5	37.5	45.9	46.45	76.35	85.75	32	38
202	2	0.5625	1	22	65.1	68.35	24.99	26.2	43.09	45.12	179.15	192.65	#NULL!	#NULL!	14.05	16	38	40.2	21	25
203	2	0.75	0	32	73.9	73.45	26.2	26.05	55.59	56.26	223.05	243.65	30.5	31.5	34.1	39.3	46.35	52.45	20	25
204	2	0.6875	1	39	60.4	61.65	24.29	24.8	36.96	38.53	136.1	147.65	15	19	16.75	17.5	27.65	32.3	21	26
205	2	0.1875	1	43	88.3	#NULL!	33.7	#NULL!	46.4458	#NULL!	174.2	#NULL!	10	#NULL!	21.9	#NULL!	21.35	#NULL!	14	#NULL!
206	2	0.125	0	42	126.6	#NULL!	39.29	#NULL!	76.2132	#NULL!	307.65	#NULL!	16.5	#NULL!	39.4	#NULL!	60	#NULL!	11	#NULL!
207	2	0.125	1	28	74.25	74.55	26.78	27.05	54.47	54.48	227.25	221.6	34	31	39.5	40.55	53.3	55.6	26	39
208	2	0.8125	1	37	54.3	55.1	23.69	24.04	35.98	37.15	140.75	129.1	14	13.5	21.25	19.9	21.25	21.85	24	20
209	2	0.125	1	44	69.7	#NULL!	26.1	#NULL!	40.7048	#NULL!	149.3	#NULL!	11	#NULL!	12.8	#NULL!	23.5	#NULL!	10	#NULL!
211	2	0.75	0	22	62.75	62.35	23.88	23.7	39.73	40.8	165.8	165.55	17.5	16.5	22.25	25	33.5	34.65	12	25
212	2	1	1	36	69.3	69.35	19.48	19.5	61.04	61.36	191.1	208.25	29.5	27.5	33.9	36.25	39.2	40.7	15	20
213	2	0.75	1	28	50.6	51.4	18.91	19.2	38.58	39.01	129.7	123	23	23	19.45	21.4	24.3	18.8	15	19
214	2	0.375	0	18	51.65	54	20.93	21.88	40.07	41.17	129.15	157.2	23.5	21.5	16.4	17.1	20	23.85	6	27
215	2	0.625	0	38	89.9	91.35	26.47	26.9	66.06	67.09	275.25	287.75	26.5	26.5	37.6	45.15	64.65	65.15	30	40
216	2	0.625	1	44	77.85	#NULL!	23.82	#NULL!	62.1	#NULL!	271.4	#NULL!	36	#NULL!	42.5	#NULL!	55.2	#NULL!	30	#NULL!
217	2	0.1875	1	35	107.1	#NULL!	40.76	#NULL!	54.4068	#NULL!	236.95	#NULL!	15.5	#NULL!	35.65	#NULL!	55.9	#NULL!	15	#NULL!
218	2	0.9375	0	37	51.2	51.35	19.15	19.81	39.94	39.74	168.7	164.95	24	24	29	29.35	35.5	34.95	14	26
219	2	0.75	1	25	74	74.05	24.5	24.5	56.95	56.75	226.3	222.05	30.5	39	32.6	32.25	58.75	59.1	20	25
220	2	0.3125	1	44	50.2	49.95	19.78	19.7	38.17	38.3	122.75	145.3	20	22	20.35	22.4	20.95	25.3	18	26
221	2	0.875	1	45	81.2	79.1	29.65	28.9	48.14	49.69	191.05	188.95	#NULL!	#NULL!	29.45	26.05	37.2	41.1	20	25
222	2	0.75	1	30	49.6	49.85	17.43	17.5	37.18	37.61	103.3	119.3	22	19.5	20	19.4	23.45	23.4	10	9
223	2	0.0625	0	44.p	62.7	#NULL!	24.03	#NULL!	37.62	#NULL!	147.85	#NULL!	14	#NULL!	24.75	#NULL!	22.05	#NULL!	14	#NULL!
224	2	0.875	1	43	125.9	127.2	31.41	31.74	91.31	88.24	343.35	333.65	27.5	27	44.25	41.3	65.45	57	10	13
225	2	0.9375	0	35	83.25	83.6	31.92	32.05	44.32	45.25	166.8	190.2	13	14	20.8	20.85	30.8	31.3	6	7
226	2	0.4375	1	34	82.15	77.55	24.83	23.4	65.14	63.6	265.7	238.6	35	37.5	26.7	26.25	45.2	42.4	20	18
227	2	0.6875	0	30	57.85	58.4	22.5	22.7	43.17	42.97	183.55	176.75	23.5	24.5	25.25	25.4	30.55	34.6	13	12
228	2	0	0	36	55.35	#NULL!	19.08	#NULL!	50.922	#NULL!	208.6	#NULL!	33.5	#NULL!	33.4	#NULL!	39.95	#NULL!	23	#NULL!
229	2	0.625	1	40	78.75	78.65	23.85	23.82	63.38	64.36	274.85	260.2	24.5	26.5	40.1	39.2	60.8	74.05	20	31
230	2	0.9375	1	43	90.1	87.5	33.7	32.6	51.11	49.34	198.25	209.75	17	18	33	32.05	42.5	47.9	17	23

## Sheet: 5. questionaires
sub_num	group1fixed	adherence	gender0men	age	Q2_av	Q3_av	Q4_av	Q5_av	Q6_av	Q7_av	Q8_av	Q9_av	Q10_av	Q11_av	Q12_av	Q2_t1	Q2_t2	Q2_t3	Q2_t4	Q3_t1	Q3_t2	Q3_t3	Q3_t4	Q4_t1	Q4_t2	Q4_t3	Q4_t4	Q5_t1	Q5_t2	Q5_t3	Q5_t4	Q6_t1	Q6_t2	Q6_t3	Q6_t4	Q7_t1	Q7_t2	Q7_t3	Q7_t4	Q8_t1	Q8_t2	Q8_t3	Q8_t4	Q9_t1	Q9_t2	Q9_t3	Q9_t4	Q10_t1	Q10_t2
101	1	0.75	0	44	100	-25	-37	-34	90	91	80	80	85	N\A	N\A	100	N\A	N\A	N\A	-25	N\A	N\A	N\A	-37	N\A	N\A	N\A	-34	N\A	N\A	N\A	90	N\A	N\A	N\A	91	N\A	N\A	N\A	80	N\A	N\A	N\A	80	N\A	N\A	N\A	85	N\A
102	1	0.875	1	37.5	100	100	100	100	87.5	87.5	100	86.25	95	100	100	100	100	100	100	100	100	100	100	100	100	100	100	100	100	100	100	90	85	85	90	90	85	85	90	100	100	100	100	90	70	85	100	100	100
103	1	0.5625	0	42	91.6667	79	78.3333	69.6667	92.6667	88.3333	73.6667	56.6667	81.6667	100	100	85	100	90	N\A	75	81	81	N\A	76	80	79	N\A	79	70	60	N\A	87	91	100	N\A	88	91	86	N\A	60	75	86	N\A	30	70	70	N\A	85	80
104	1	0.8125	1	28	100	8	72	64.5	94.25	77.75	90.5	-27.75	91.25	59.75	95.5	100	100	100	100	-97	-56	93	92	23	91	94	80	-14	90	89	93	83	100	100	94	72	89	80	70	72	100	98	92	-32	-37	-21	-21	85	90
105	1	0.625	0	45	96.25	27.25	49.5	-6	-30.25	-21.25	57.75	7.33333	79	55.5	80.5	100	100	100	85	59	-17	46	21	56	-12	65	89	58	-46	-35	-1	-58	-12	19	-70	-33	-9	16	-59	52	61	51	67	-25	N\A	16	31	71	100
106	1	0.625	0	22	100	100	100	100	100	84	100	82	100	100	100	N\A	100	100	N\A	N\A	100	100	N\A	N\A	100	100	N\A	N\A	100	100	N\A	N\A	100	100	N\A	N\A	75	93	N\A	N\A	100	100	N\A	N\A	70	94	N\A	N\A	100
107	1	0.5	0	38	96.3333	75.3333	65.3333	71	98.3333	89	82	93.3333	80	97	97.5	89	100	100	N\A	80	78	68	N\A	60	69	67	N\A	90	36	87	N\A	100	95	100	N\A	80	87	100	N\A	79	79	88	N\A	80	100	100	N\A	80	N\A
108	1	0.5	1	37	100	45	13.25	52.5	82	-5	87	-46.25	76.5	100	100	100	100	100	100	36	32	48	64	39	-27	11	30	47	36	42	85	47	94	96	91	47	-64	13	-16	74	100	80	94	41	-100	-78	-48	100	100
109	1	0.5625	1	31	78.5	69.25	28.75	23.5	54.75	53.75	55	89	60.5	63.5	96.5	95	85	60	74	100	89	57	31	40	40	3	32	50	4	7	33	50	59	55	55	50	52	55	58	50	66	73	31	100	100	72	84	59	68
110	1	0.75	1	30	87.5	74.75	68	73	76.25	68.25	49.75	43.6667	84.75	86.25	79.25	85	75	90	100	100	78	79	42	90	61	72	49	91	89	60	52	100	63	89	53	50	67	86	70	88	-25	61	75	75	N\A	1	55	100	68
111	1	0.5625	1	37	91.5	62.25	58.25	80.25	78.75	77.75	78.75	60.25	65	92.5	98.5	100	100	91	75	6	61	97	85	100	86	-19	66	100	78	43	100	100	66	49	100	96	69	60	86	100	45	70	100	100	52	46	43	100	75
112	1	0.5	0	34	95.75	65.5	63	23.5	68.25	71.25	86	87.75	95.75	86.25	92.5	83	100	100	100	28	100	34	100	N\A	100	40	49	-30	N\A	77	N\A	38	69	66	100	15	70	100	100	44	100	100	100	51	100	100	100	100	100
113	1	0.5	0	32	86	100	-50	100	52	48	100	79	100	72	100	86	N\A	N\A	N\A	100	N\A	N\A	N\A	-50	N\A	N\A	N\A	100	N\A	N\A	N\A	52	N\A	N\A	N\A	48	N\A	N\A	N\A	100	N\A	N\A	N\A	79	N\A	N\A	N\A	100	N\A
114	1	0.75	1	28	100	92.5	97.5	82.75	92.5	93.75	96.25	100	100	96.25	96.25	100	100	100	100	70	100	100	100	100	100	90	100	50	100	81	100	80	90	100	100	80	95	100	100	85	100	100	100	100	100	100	100	100	100
115	1	0.6875	1	44	85.75	84.25	83.3333	85.75	89	84	89.75	19.5	59.75	89.25	100	100	90	77	76	100	85	84	68	100	87	N\A	63	100	87	72	84	100	95	77	84	100	93	75	68	100	97	79	83	14	65	-54	53	91	81
117	1	0.5625	1	39	100	76	69	72	49	36	88	100	83	100	100	N\A	100	N\A	N\A	N\A	76	N\A	N\A	N\A	69	N\A	N\A	N\A	72	N\A	N\A	N\A	49	N\A	N\A	N\A	36	N\A	N\A	N\A	88	N\A	N\A	N\A	100	N\A	N\A	N\A	83
118	1	0.875	0	40	80.75	49.75	21.5	7.25	66.25	33.6667	43.6667	60.75	55	46.5	61.75	80	80	80	83	90	40	40	29	40	20	-20	46	20	30	-40	19	35	70	76	84	N\A	33	19	49	N\A	31	51	49	50	74	70	49	50	30
119	1	0.75	1	33	94.6667	46.6667	20.3333	36.3333	75	75.3333	-3.66667	83	85.6667	84	90	93	N\A	96	95	76	N\A	29	35	78	N\A	-41	24	80	N\A	42	-13	78	N\A	71	76	82	N\A	70	74	-24	N\A	-27	40	90	N\A	76	83	90	N\A
120	1	0.4375	1	40	82	86.6667	63.6667	91	100	93	93.6667	57.6667	87.6667	100	100	80	N\A	85	81	100	N\A	100	60	70	N\A	71	50	73	N\A	100	100	100	N\A	100	100	100	N\A	88	91	81	N\A	100	100	68	N\A	26	79	81	N\A
121	1	0.1875	1	38	100	100	100	100	100	84	100	79	100	100	-100	100	N\A	N\A	N\A	100	N\A	N\A	N\A	100	N\A	N\A	N\A	100	N\A	N\A	N\A	100	N\A	N\A	N\A	84	N\A	N\A	N\A	100	N\A	N\A	N\A	79	N\A	N\A	N\A	100	N\A
122	1	0.5625	1	36	72	8.66667	-14.3333	-24	-27.3333	-44	-35	-25.3333	10.3333	100	69.6667	100	44	N\A	N\A	-4	100	-70	N\A	-33	42	-52	N\A	-100	100	-72	N\A	-25	-22	-35	N\A	-50	-41	-41	N\A	-30	-40	N\A	N\A	-10	-32	-34	N\A	36	25
123	1	0.875	1	22	100	100	86.3333	100	100	72	100	100	76.6667	53.6667	-48	100	N\A	100	100	100	N\A	100	100	59	N\A	100	100	100	N\A	100	100	100	N\A	100	100	96	N\A	50	70	100	N\A	100	100	100	N\A	100	100	100	N\A
124	1	0.5	1	42	30.75	-14	-0.25	8.5	86.25	39.5	55	-42.5	11.75	92.5	97.5	100	20	-47	50	64	-70	-90	40	90	-70	-62	41	80	-60	-56	70	95	60	90	100	90	-31	50	49	100	70	-30	80	60	-40	-90	-100	100	-63
125	1	0.1875	0	19	100	96	90	100	100	100	100	96	100	100	-41	100	N\A	N\A	N\A	96	N\A	N\A	N\A	90	N\A	N\A	N\A	100	N\A	N\A	N\A	100	N\A	N\A	N\A	100	N\A	N\A	N\A	100	N\A	N\A	N\A	96	N\A	N\A	N\A	100	N\A
126	1	0.875	1	43	100	98	98.25	100	98.5	94.5	100	96	100	98.25	100	100	100	100	100	92	100	100	100	93	100	100	100	100	100	100	100	100	100	100	94	100	86	96	96	100	100	100	100	100	99	89	96	100	100
127	1	0.8125	0	40	100	95	62	99.25	100	100	98.75	75.5	97	100	100	100	100	100	100	100	100	89	91	100	6	62	80	100	100	97	100	100	100	100	100	100	100	100	100	100	100	100	95	100	45	88	69	100	93
128	1	0.75	1	38	17.3333	32	15	45.5	70.6667	60.3333	85.3333	7.33333	19	93.6667	100	10	21	N\A	21	30	31	N\A	35	-10	29	N\A	26	60	N\A	N\A	31	81	81	N\A	50	60	71	N\A	50	90	76	N\A	90	-20	21	N\A	21	10	26
129	1	0	1	30	88.5	67.5	75	66.5	95	88.25	59.25	97.75	65.6667	70.6667	91.3333	100	100	54	100	87	38	65	80	100	N\A	48	77	66	33	93	74	100	100	99	81	90	83	98	82	87	34	31	85	100	100	95	96	94	N\A
				Q_av	88.4018	64.2976	52.7411	60.3125	76.4048	65.0238	75.4077	56.997	76.6399	86.5741	76.213
				Q_sd	19.5548	35.5842	41.5148	40.113	32.8712	36.1139	31.6658	45.7477	25.5128	16.8298	50.9155
				Q_median	96	75.0417	64.5	71.5	88.25	77.75	86.5	79	83.875	93.6667	97.5
				Q_range	82.6667	125	150	134	130.25	144	135	146.25	89.6667	53.5	200
201	2	0.5	0	25	49.6667	58.3333	-21.3333	52	47.3333	45.3333	11	77.3333	42.3333	74	77.5	66	76	N\A	7	87	84	N\A	4	-38	-34	N\A	8	78	72	N\A	6	77	60	N\A	5	72	58	N\A	6	-66	40	N\A	59	70	65	N\A	97	46	73
202	2	0.5625	1	22	100	100	100	100	96.25	85.75	100	100	100	100	100	100	100	100	100	100	100	100	100	100	100	100	100	100	100	100	100	100	100	85	100	80	78	85	100	100	100	100	100	100	100	100	100	100	100
203	2	0.75	0	32	96.6667	67	36.3333	91.3333	12.6667	45.6667	98.6667	98.6667	93.3333	53.3333	98.6667	N\A	100	100	90	N\A	81	59	61	N\A	43	89	-23	N\A	98	100	76	N\A	-12	69	-19	N\A	25	70	42	N\A	100	100	96	N\A	100	100	96	N\A	100
204	2	0.6875	1	39	91	92	87.3333	96.3333	100	100	100	100	100	100	100	100	100	N\A	73	100	100	N\A	76	100	75	N\A	87	100	100	N\A	89	100	100	N\A	100	100	100	N\A	100	100	100	N\A	100	100	100	N\A	100	100	100
205	2	0.1875	1	43	82.6667	65.3333	75.3333	77.6667	91.3333	90.6667	89	85.6667	94.6667	83	10	100	N\A	73	75	62	N\A	44	90	67	N\A	59	100	55	N\A	78	100	85	N\A	89	100	90	N\A	82	100	73	N\A	94	100	83	N\A	74	100	100	N\A
206	2	0.125	0	42	N\A	N\A	N\A	N\A	N\A	N\A	N\A	N\A	N\A	N\A	N\A	N\A	N\A	N\A	N\A	N\A	N\A	N\A	N\A	N\A	N\A	N\A	N\A	N\A	N\A	N\A	N\A	N\A	N\A	N\A	N\A	N\A	N\A	N\A	N\A	N\A	N\A	N\A	N\A	N\A	N\A	N\A	N\A	N\A	N\A
207	2	0.125	0	28	97	93.3333	91.6667	87.6667	72.3333	80.6667	88.6667	95.6667	96	44.5	-69	100	91	100	N\A	100	100	80	N\A	100	96	79	N\A	100	89	74	N\A	100	32	85	N\A	85	71	86	N\A	87	90	89	N\A	100	87	100	N\A	100	92
208	2	0.8125	1	37	100	100	21	100	100	24	-60	100	86	100	100	100	N\A	N\A	N\A	100	N\A	N\A	N\A	21	N\A	N\A	N\A	100	N\A	N\A	N\A	100	N\A	N\A	N\A	24	N\A	N\A	N\A	-60	N\A	N\A	N\A	100	N\A	N\A	N\A	86	N\A
209	2	0.125	1	44	N\A	N\A	N\A	N\A	N\A	N\A	N\A	N\A	N\A	N\A	N\A	N\A	N\A	N\A	N\A	N\A	N\A	N\A	N\A	N\A	N\A	N\A	N\A	N\A	N\A	N\A	N\A	N\A	N\A	N\A	N\A	N\A	N\A	N\A	N\A	N\A	N\A	N\A	N\A	N\A	N\A	N\A	N\A	N\A	N\A
211	2	0.75	0	22	93.75	94.75	90.75	79	86.25	75	96.5	82	95	79.75	97	96	100	100	79	99	100	100	80	99	100	100	64	89	61	90	76	80	86	90	89	86	62	75	77	100	100	92	94	86	87	76	79	96	100
212	2	1	1	36	65.75	52.75	43	47.5	77.5	68.5	-1	31.25	55	65.5	42	79	53	59	72	82	27	45	57	55	38	28	51	55	40	45	50	81	79	71	79	80	65	60	69	-35	22	29	-20	70	-13	43	25	75	48
213	2	0.75	1	28	48.75	0.5	-9.75	43.5	50	45.25	-12.75	42.25	40.25	81.25	53.75	67	54	41	33	16	-37	-15	38	24	-18	-32	-13	47	30	51	46	55	32	47	66	54	53	24	50	-25	-36	-21	31	64	29	39	37	53	43
214	2	0.375	0	18	80	66	N\A	N\A	N\A	N\A	N\A	N\A	N\A	N\A	N\A	80	N\A	N\A	N\A	66	N\A	N\A	N\A	N\A	N\A	N\A	N\A	N\A	N\A	N\A	N\A	N\A	N\A	N\A	N\A	N\A	N\A	N\A	N\A	N\A	N\A	N\A	N\A	N\A	N\A	N\A	N\A	N\A	N\A
215	2	0.625	0	38	71.6667	70	43.3333	-23.3333	46.6667	26.6667	51.3333	9	62.3333	41.6667	16.6667	85	50	N\A	80	85	75	N\A	50	25	50	N\A	55	-50	-50	N\A	30	50	20	N\A	70	50	-20	N\A	50	54	50	N\A	50	-48	50	N\A	25	77	50
216	2	0.625	1	44	17	100	83.6667	83.3333	-24.3333	-8.33333	100	100	-18.3333	93	100	51	50	-50	N\A	100	100	100	N\A	51	100	100	N\A	50	100	100	N\A	-49	-79	55	N\A	-19	-61	55	N\A	100	100	100	N\A	100	100	100	N\A	55	-60
217	2	0.1875	1	35	100	96	93	100	83	86.5	97	90	100	87.5	-53	100	N\A	N\A	100	92	N\A	N\A	100	86	N\A	N\A	100	100	N\A	N\A	100	83	N\A	N\A	83	87	N\A	N\A	86	94	N\A	N\A	100	80	N\A	N\A	100	100	N\A
218	2	0.9375	0	37	100	98.75	78	79	84	56	97.75	53.5	100	84.25	96	100	100	100	100	100	100	95	100	100	75	76	61	100	100	36	80	75	77	84	100	61	50	33	80	100	100	91	100	100	53	31	30	100	100
219	2	0.75	1	25	94.6667	93.3333	75	94.3333	65.6667	66.3333	84	70.6667	89	81	87	90	94	100	N\A	100	93	87	N\A	50	80	95	N\A	100	93	90	N\A	59	61	77	N\A	71	53	75	N\A	86	74	92	N\A	63	68	81	N\A	96	91
220	2	0.3125	1	44	-38	44.3333	-87.6667	56	100	100	-61	-63	10.3333	100	73.6667	-55	N\A	-30	-29	-6	N\A	39	100	-79	N\A	-84	-100	20	N\A	48	100	100	N\A	100	100	100	N\A	100	100	-57	N\A	-83	-43	-10	N\A	-79	-100	-20	N\A
221	2	0.875	1	45	75.3333	29	-3.66667	72	62.6667	31.3333	61.6667	-23.3333	73.3333	57.6667	83.3333	85	81	N\A	60	20	87	N\A	-20	-31	40	N\A	-20	46	95	N\A	75	40	93	N\A	55	20	50	N\A	24	35	80	N\A	70	15	-35	N\A	-50	77	85
222	2	0.75	1	30	66	76.3333	75.3333	86.6667	91.6667	73	43.6667	30	60.3333	91.6667	93.3333	86	N\A	80	32	90	N\A	100	39	90	N\A	100	36	100	N\A	79	81	100	N\A	100	75	81	N\A	81	57	79	N\A	30	22	41	N\A	31	18	80	N\A
223	2	0.0625	1	44	N\A	N\A	N\A	N\A	N\A	N\A	N\A	N\A	N\A	N\A	N\A	N\A	N\A	N\A	N\A	N\A	N\A	N\A	N\A	N\A	N\A	N\A	N\A	N\A	N\A	N\A	N\A	N\A	N\A	N\A	N\A	N\A	N\A	N\A	N\A	N\A	N\A	N\A	N\A	N\A	N\A	N\A	N\A	N\A	N\A
224	2	0.875	1	43	48.75	55	39.25	-16.25	62.5	47.25	64.75	55.5	-19.75	65	65.25	50	25	60	60	50	50	60	60	25	40	32	60	-50	-50	15	20	60	50	70	70	40	30	59	60	35	80	79	65	40	50	71	61	-20	-50
225	2	0.9375	0	35	93.25	17.25	-8.5	25.75	69.75	66.5	67.25	70.75	83.5	52.75	90	100	90	90	93	55	-45	77	-18	45	-70	38	-47	-50	59	29	65	90	51	74	64	60	37	84	85	50	61	83	75	50	71	87	75	95	85
226	2	0.4375	1	34	100	100	100	100	-51	-48	100	-66	100	100	100	100	N\A	N\A	N\A	100	N\A	N\A	N\A	100	N\A	N\A	N\A	100	N\A	N\A	N\A	-51	N\A	N\A	N\A	-48	N\A	N\A	N\A	100	N\A	N\A	N\A	-66	N\A	N\A	N\A	100	N\A
227	2	0.6875	0	30	99.5	90.25	95.75	89.25	70	55.75	60.75	19.75	90.5	98.75	100	100	100	100	98	71	100	100	90	95	100	96	92	97	96	81	83	92	72	51	65	65	42	66	50	92	67	12	72	60	-34	5	48	100	99
228	2	0	0	36	6	100	3	100	100	100	10	100	12	100	2	6	N\A	N\A	N\A	100	N\A	N\A	N\A	3	N\A	N\A	N\A	100	N\A	N\A	N\A	100	N\A	N\A	N\A	100	N\A	N\A	N\A	10	N\A	N\A	N\A	100	N\A	N\A	N\A	12	N\A
229	2	0.625	1	40	92.6667	74.6667	43.3333	70.3333	81.3333	40	33	-38	69.3333	100	79.5	100	100	N\A	78	84	70	N\A	70	61	44	N\A	25	48	100	N\A	63	70	100	N\A	74	41	11	N\A	68	50	8	N\A	41	-44	-21	N\A	-49	100	47
230	2	0.9375	1	43	100	83.5	85.75	70.5	87.75	90	97	96.5	100	95.25	98.75	100	100	100	100	86	71	86	91	86	81	88	88	50	60	76	96	95	86	84	86	95	86	89	90	100	90	100	98	100	100	90	96	100	100
				Q_av	74.3109	73.7853	49.1967	70.5033	66.5333	57.7533	56.69	52.7267	68.6067	81.1933	65.6967
				Q_sd	34.0285	27.1235	47.4231	33.1267	37.1276	34.4397	48.7689	51.8568	36.7946	18.8605	47.3922
				Q_median	91.8333	79.9167	75	79	77.5	66.3333	67.25	70.75	86	84.25	87
				Q_range	138	99.5	187.667	123.333	151	148	161	166	119.75	58.3333	169
[truncated: 22 more columns]

## Sheet: 6. questionnaires index
question_No	Questions:
2	Participating in the exercise program is a positive experience
3	I exercised according to my preferences
4	The way I exercise is aligned with my preferences and interests
5	I feel that I have the opportunity to make choices with regard to the way I exercise
6	Regulating workout intensity using the RPE is clear to me
7	I can successfully regulate the exercise intensity using RPE
8	I am satisfied with the variety of exercise selection in the program
9	I find the resistance band comfortable to use
10	Your enjoyment from the last 4 sessions attended
11	Your experience with zoom – video and audio quality.
12	Your experience with zoom – communication with the instructor
component_No
component-1	general satisfaction from following the exercise program
component-2	satisfaction from using the RPE to regulate effort
component-3	satisfaction from using the online platform.
